# Supplementary material for: Palladium-catalyzed decarboxylation of higher aliphatic esters: Towards a new protocol to the second generation biodiesel production
Source: Royal Society of Chemistry journal article supplement (doi:10.1039/b917690j), 2010-01-01
Supplement: b917690j.pdf [file b917690j.pdf]

## **Electronic Supplementary Information ( ESI )**

### **Palladium-catalyzed decarboxylation of higher aliphatic esters: Towards a new protocol to the second generation biodiesel production**

Junxing Han, Hui Sun, Yuqi Ding, Hui Lou\* and Xiaoming Zheng

#### **Table of contents**

|                                                                          |                     |
|--------------------------------------------------------------------------|---------------------|
| Characterization of freshly prepared 5%Pd/BaSO <sub>4</sub> .....        | <b>Fig. SI1-SI3</b> |
| Characterization of freshly prepared 5%Pd/MWCNTs.....                    | <b>Fig. SI4-SI6</b> |
| GC results of methyl stearate liquid products.....                       | <b>Fig. SI7</b>     |
| GC result of methyl palmitate liquid products.....                       | <b>Fig. SI8</b>     |
| GC result of methyl laurate liquid products.....                         | <b>Fig. SI9</b>     |
| GC result of ethyl stearate liquid products.....                         | <b>Fig. SI10</b>    |
| GC result of ethyl octanoate liquid products.....                        | <b>Fig. SI11</b>    |
| GC result of methyl palmitate gas products.....                          | <b>Fig. SI12</b>    |
| GC-MS result of methyl palmitate gas products.....                       | <b>Fig. SI13</b>    |
| GC result of ethyl octanoate gas products.....                           | <b>Fig. SI14</b>    |
| GC-MS result of ethyl octanoate gas products.....                        | <b>Fig. SI15</b>    |
| TEM images of 5%Pd/BaSO <sub>4</sub> : a) freshly prepared, b) used..... | <b>Fig. SI16</b>    |

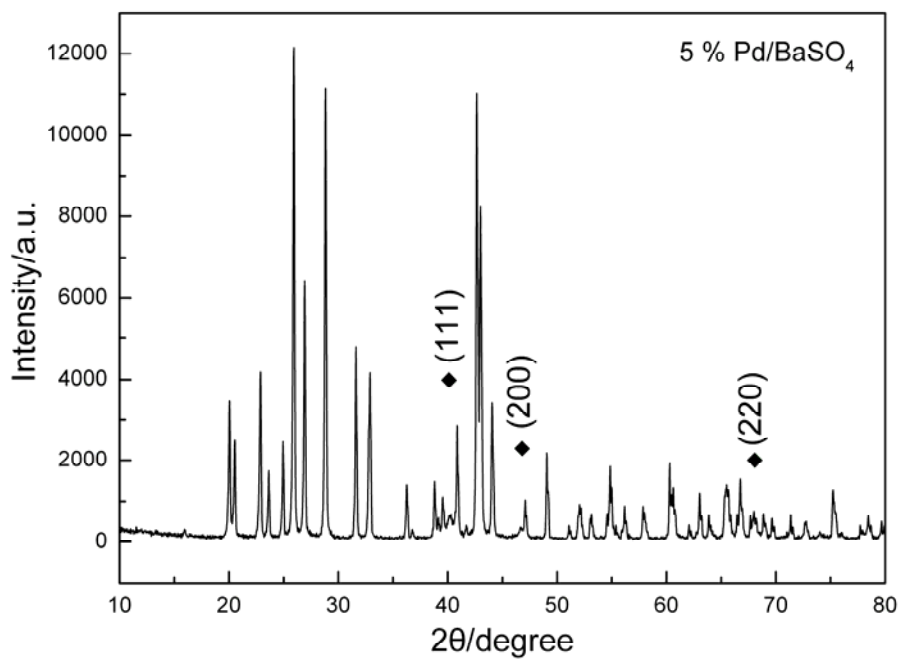

**Fig. SI1** XRD pattern of freshly prepared 5%Pd/BaSO<sub>4</sub>

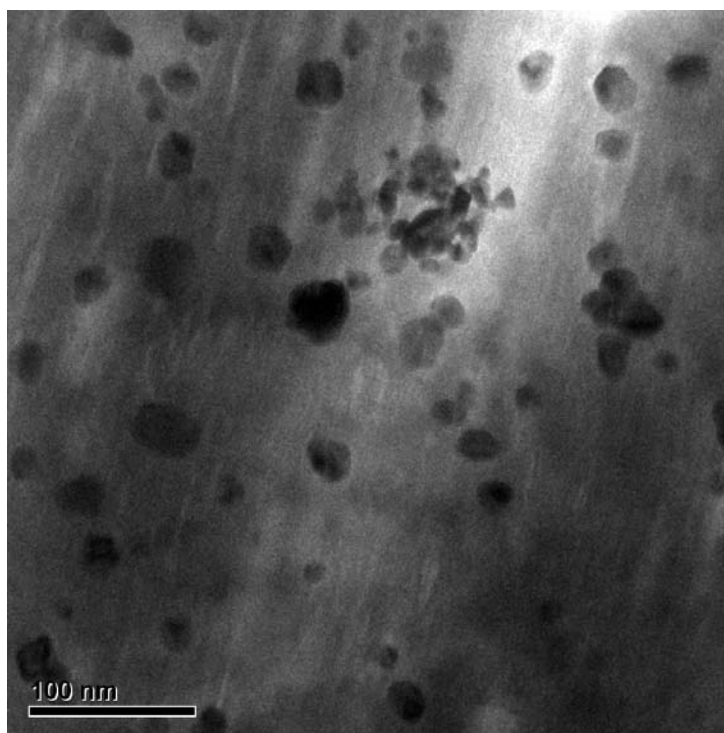

**Fig. SI2** TEM image of freshly prepared 5%Pd/BaSO<sub>4</sub>

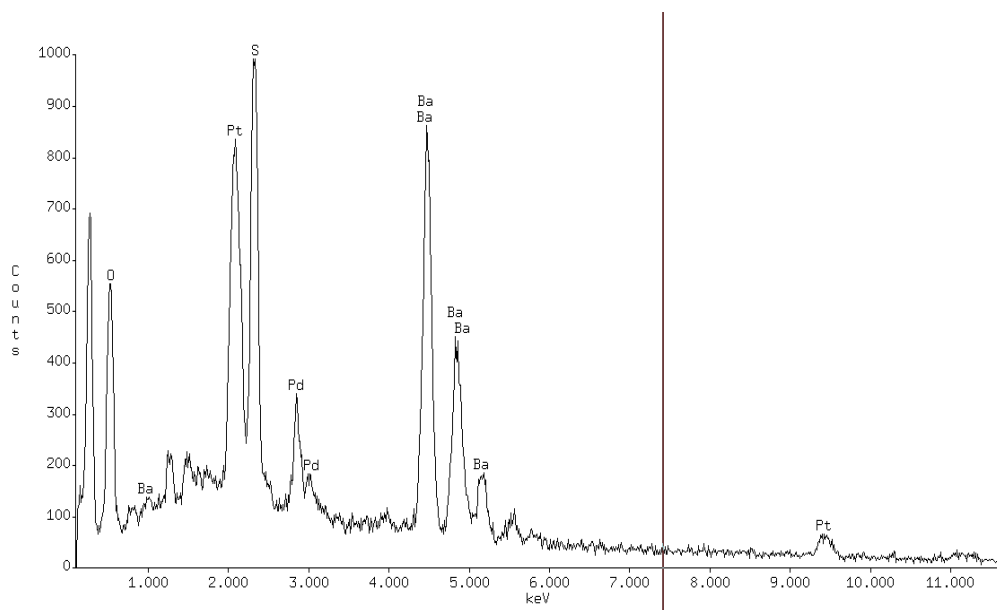

**Fig. SI3** EDS pattern of freshly prepared 5%Pd/BaSO<sub>4</sub>

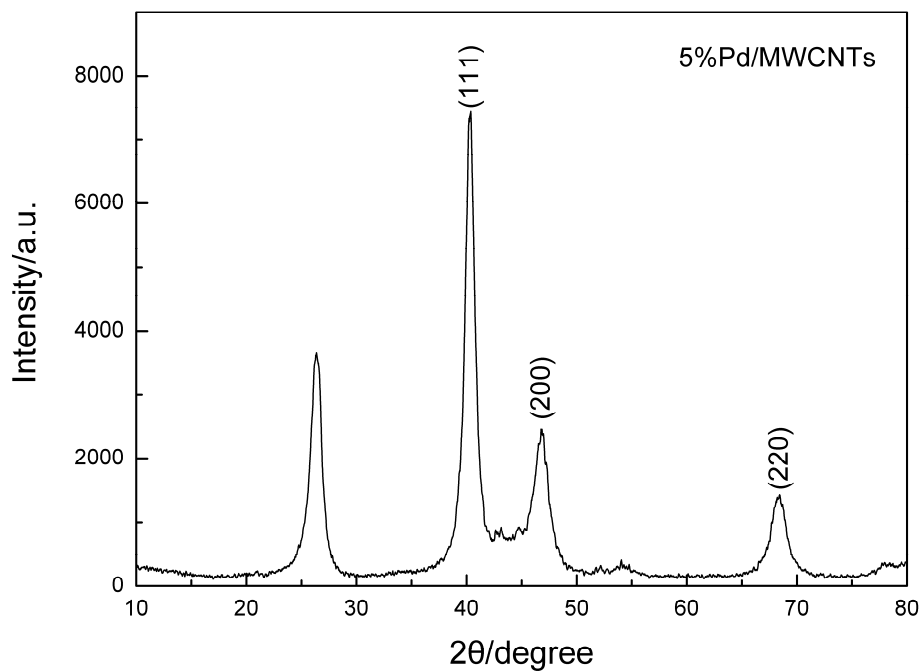

**Fig. SI4** XRD pattern of freshly prepared 5%Pd/MWCNTs

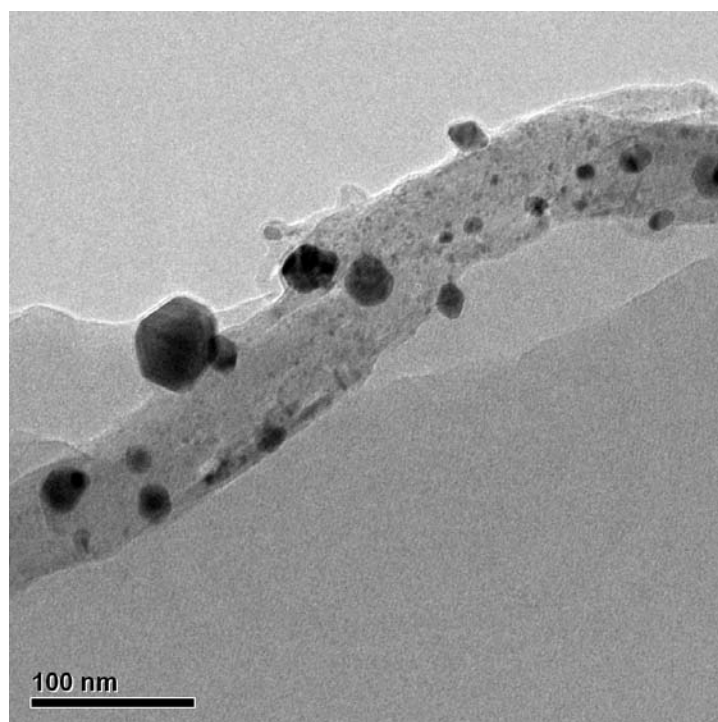

**Fig. SI5** TEM image of freshly prepared 5%Pd/MWCNTs

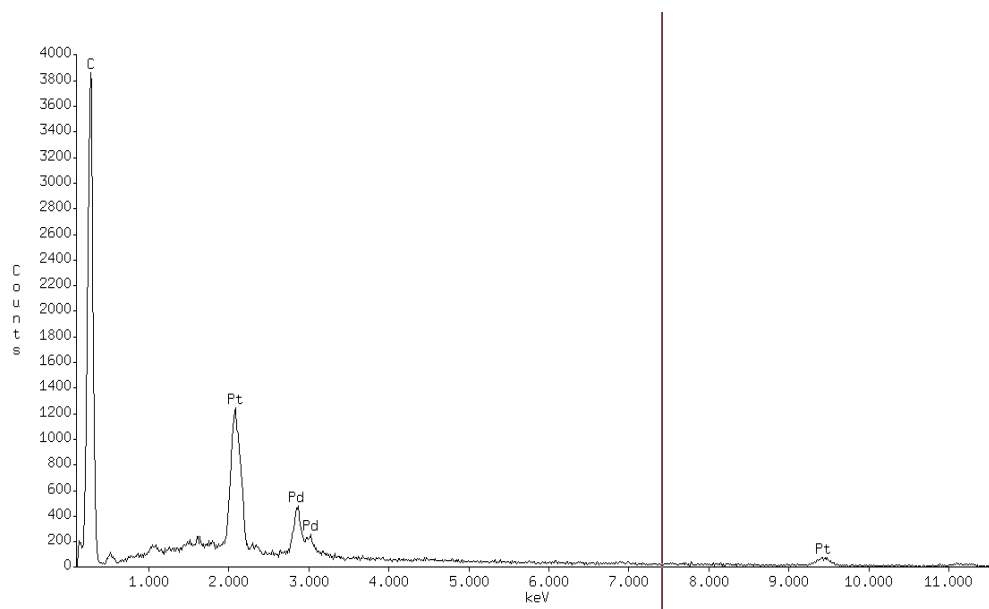

**Fig. SI6** EDS pattern of freshly prepared 5%Pd/MWCNTs

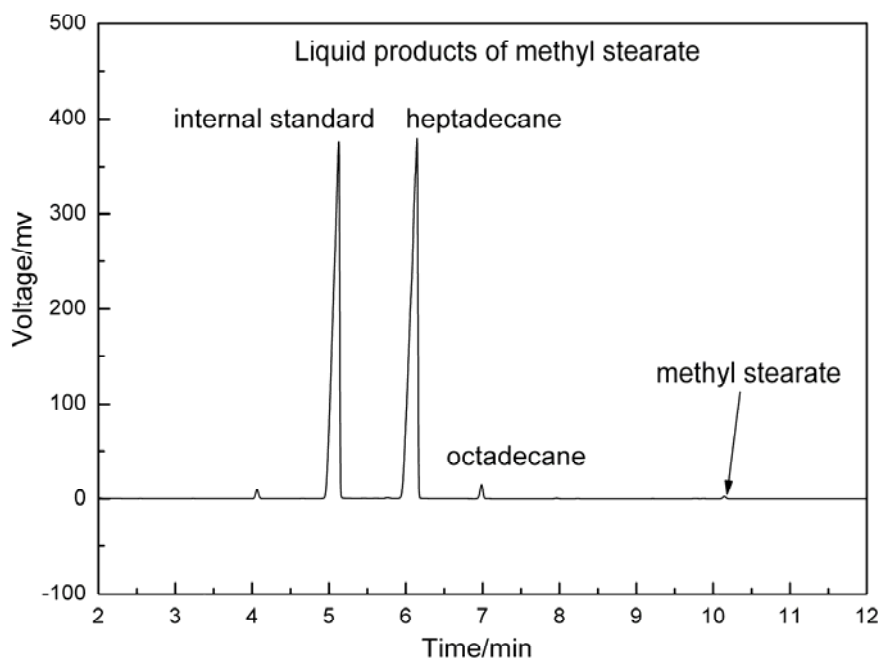

**Fig. SI7** GC result of methyl stearate liquid products

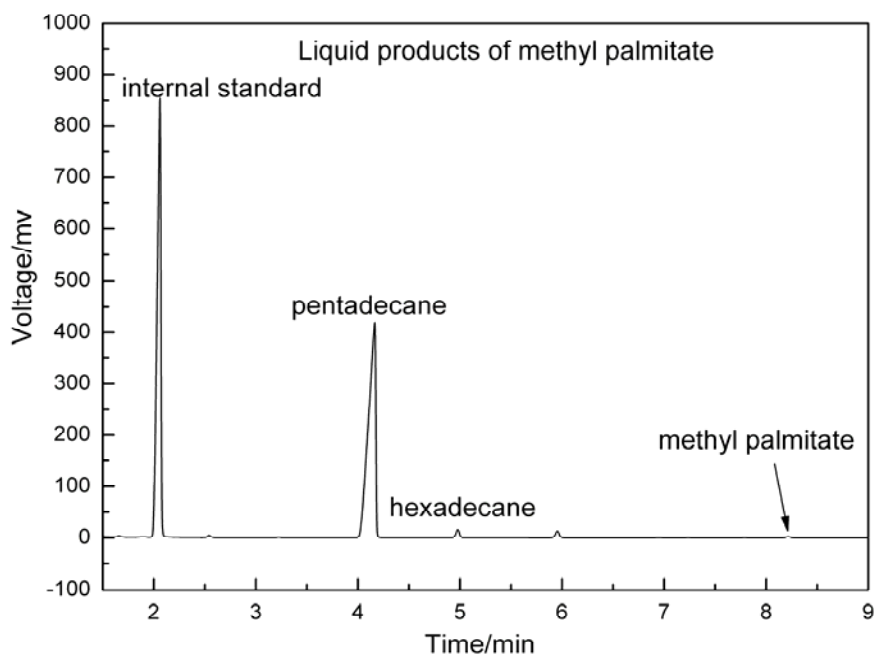

**Fig. SI8** GC result of methyl palmitate liquid products

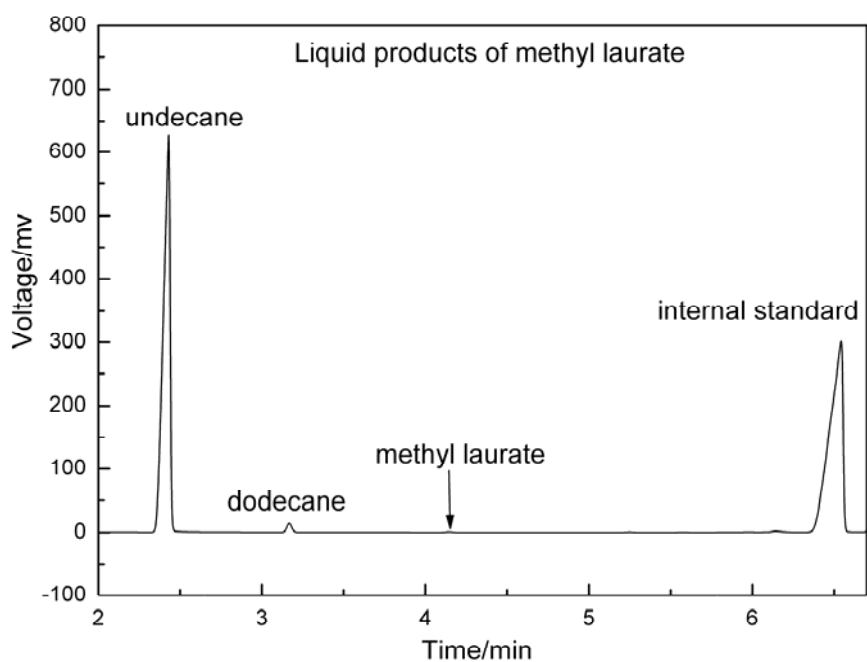

**Fig. SI9** GC result of methyl laurate liquid products

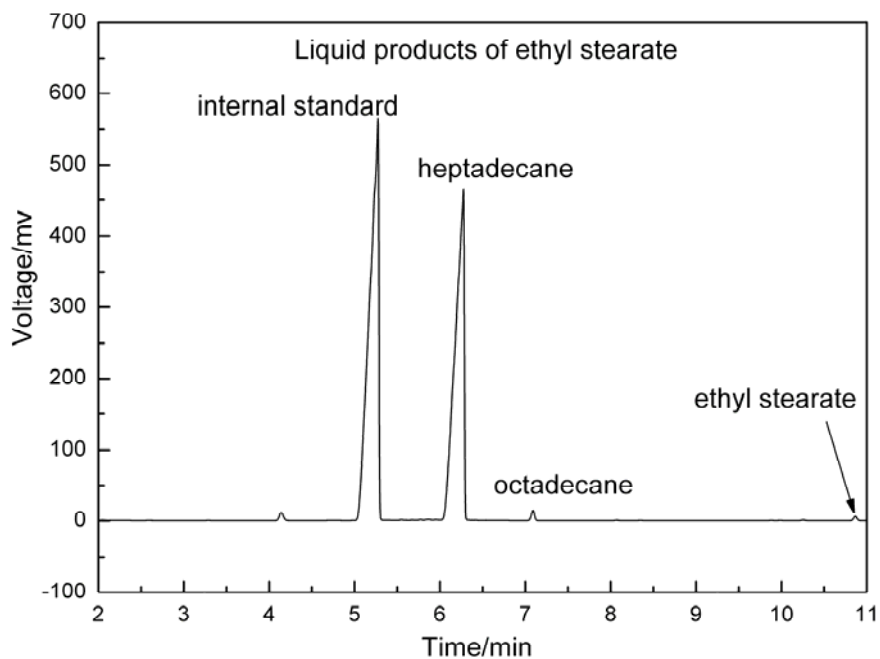

**Fig. SI10** GC result of ethyl stearate liquid products

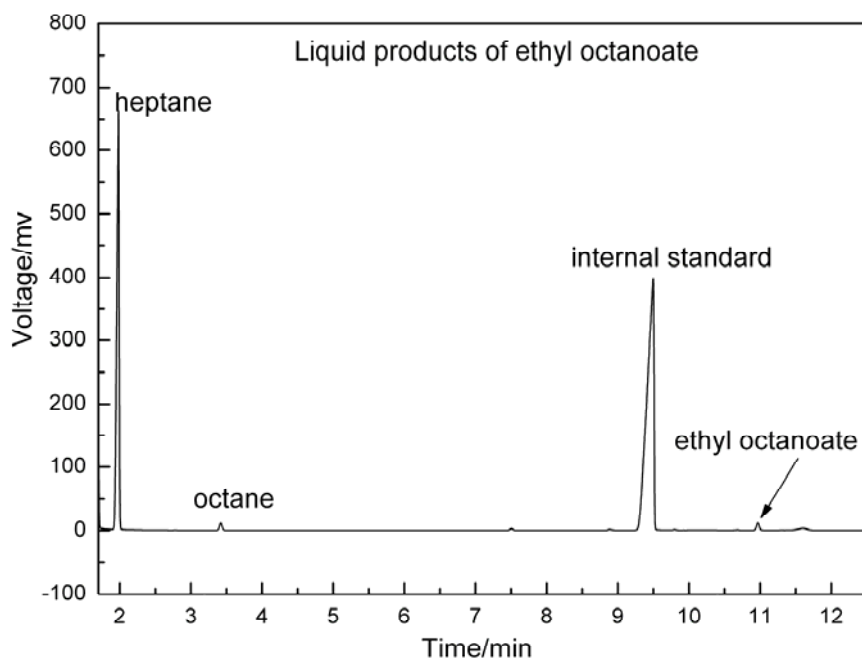

**Fig. SI11** GC result of ethyl octanoate liquid products

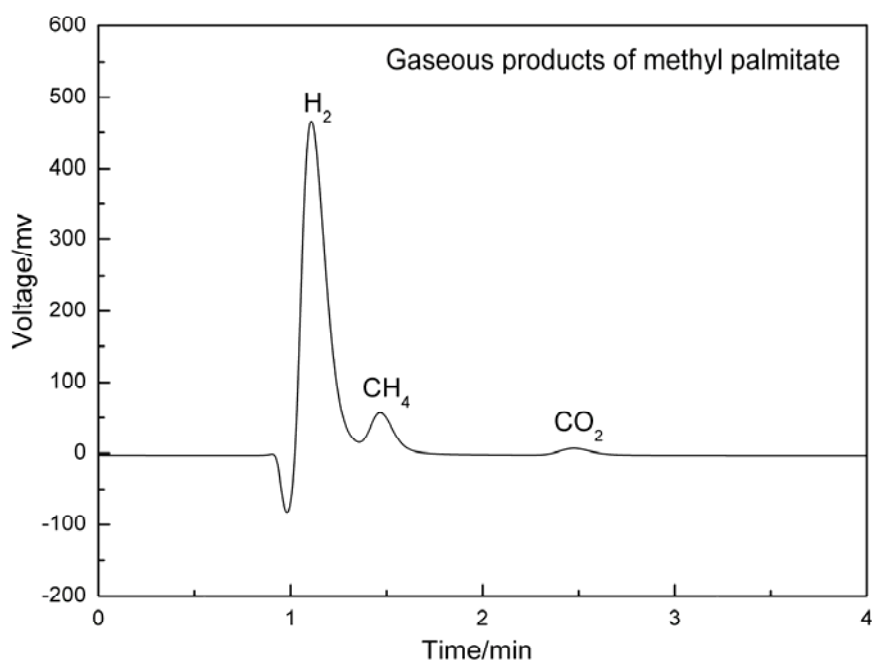

**Fig. SI12** GC result of methyl palmitate gas products

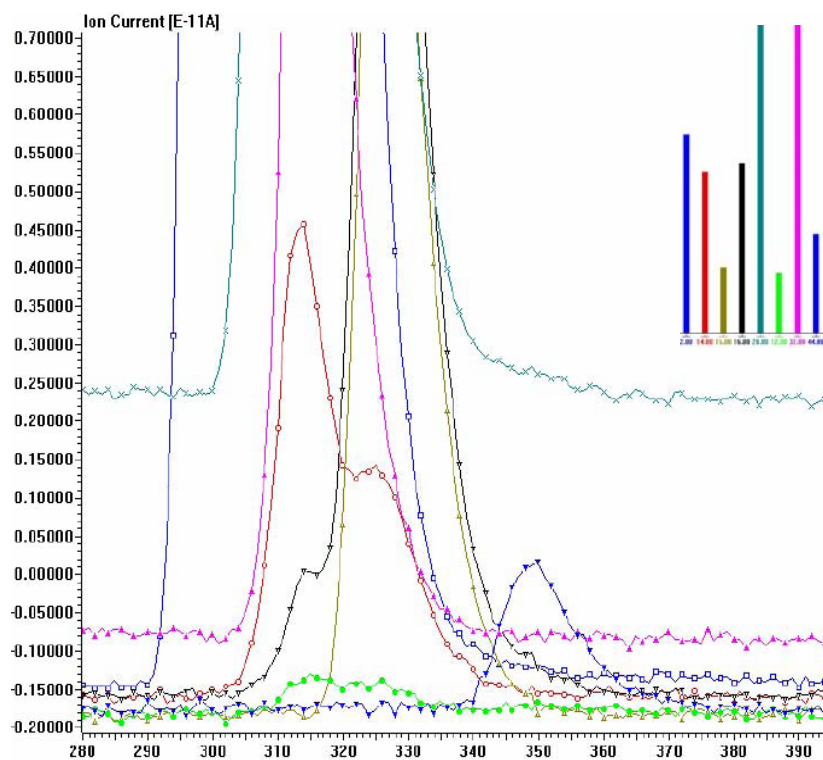

**Fig. SI13** GC-MS result of methyl palmitate gas products

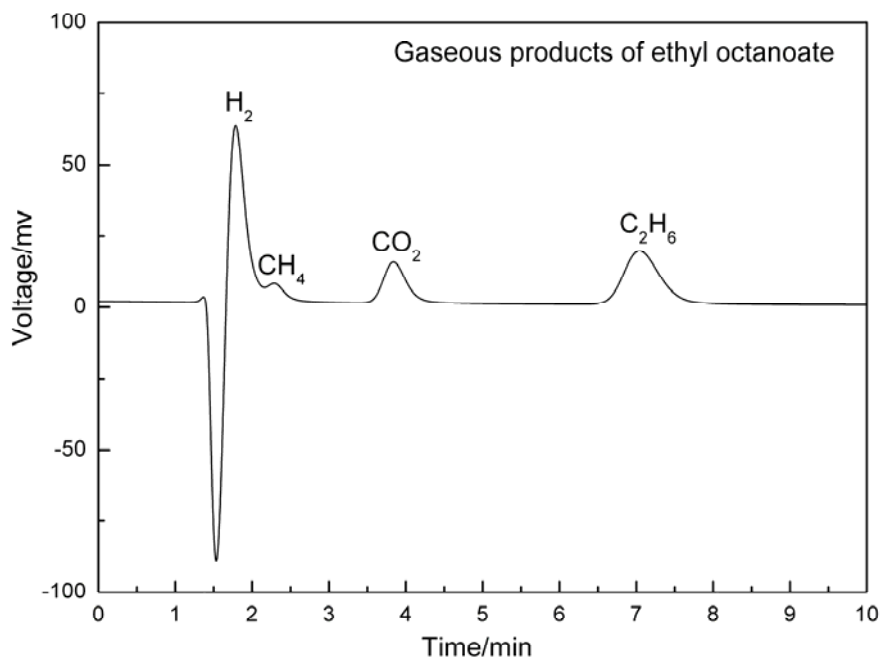

**Fig. SI14** GC result of ethyl octanoate gas products



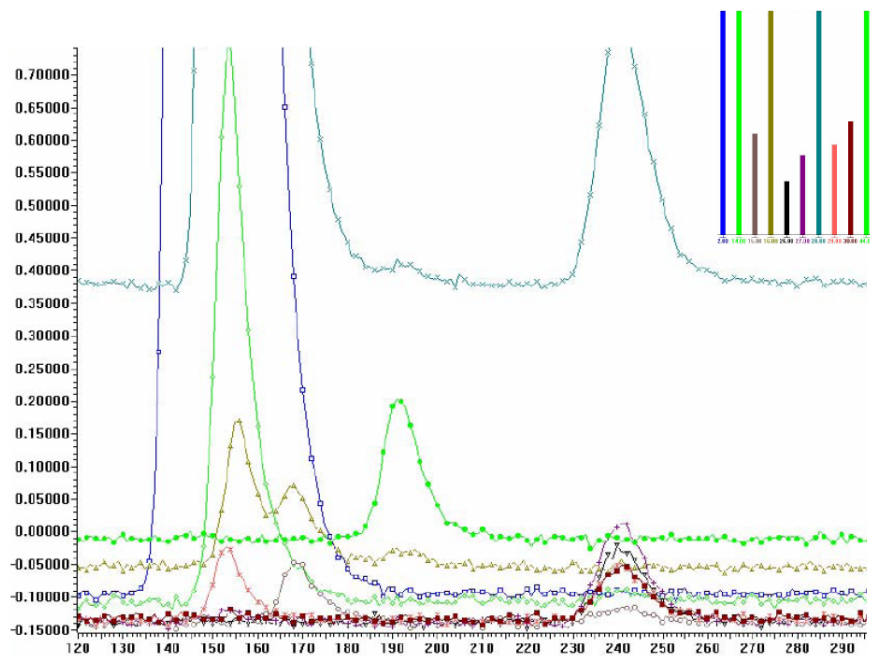

**Fig. SI15** GC-MS result of ethyl octanoate gas products

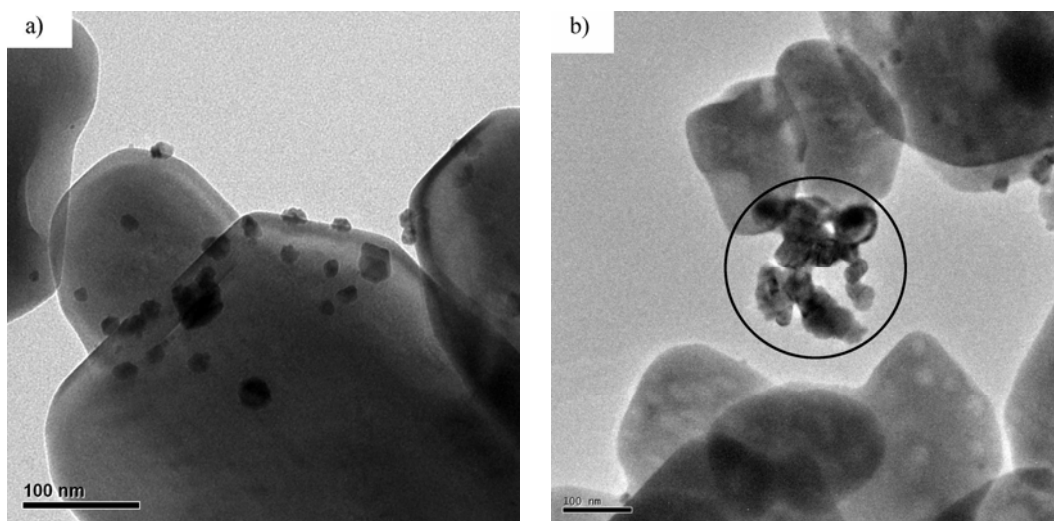

**Fig. SI16** TEM images of 5%Pd/BaSO<sub>4</sub>: a) freshly prepared, b) used
